# Supplementary material
Source: ML conference proceedings conference paper supplement (https://proceedings.mlr.press/v97/diaconu19a.html)
Supplement: Supplementary file 1 [file diaconu19a-supp.pdf]

---

# Supplementary Material

## Learning to Convolve: A Generalized Weight-Tying Approach

---

Anonymous Authors<sup>1</sup>

Here we provide proofs of the equivariance properties of the of the group convolution and unitary group convolution. We also show example of filters and activations.

### 1. Equivariance Of The Group Convolution

Here we provide a copy of [Cohen & Welling \(2016\)](#)'s equivariance proof of the discrete group convolution. For a signal  $f : X \rightarrow \mathbb{R}$ , filter  $\psi : X \rightarrow \mathbb{R}$ , domain  $X$ , group  $G$ , and group action  $\mathcal{L}_g$  where  $\mathcal{L}_g[f](x) = f(\mathcal{L}_g^{-1}[x])$ , we have

$$[\mathcal{L}_t[f] \star_G \psi](g) = \sum_{x \in X} \mathcal{L}_t[f](x) \psi(\mathcal{L}_g^{-1}[x]) \quad (1)$$

$$= \sum_{x \in G} f(\mathcal{L}_t^{-1}[x]) \psi(\mathcal{L}_g^{-1}[x]) \quad (2)$$

$$= \sum_{x' \in G} f(x') \psi(\mathcal{L}_g^{-1}[\mathcal{L}_t[x']]) \quad (3)$$

$$= \sum_{x' \in G} f(x') \psi(\mathcal{L}_{g^{-1}t}[x']) \quad (4)$$

$$= \sum_{x' \in G} f(x') \psi(\mathcal{L}_{(t^{-1}g)^{-1}}[x']) \quad (5)$$

$$= [f \star_G \psi](t^{-1}g) \quad (6)$$

$$= \mathcal{L}_t[f \star_G \psi](g) \quad (7)$$

From line 1 to 2 we used the definition  $\mathcal{L}_g[f](x) = f(\mathcal{L}_g^{-1}[x])$ ; from line 2 to 3 we performed as change of variables  $x' = \mathcal{L}_t^{-1}[x]$  or equally  $x = \mathcal{L}_t[x']$ ; from line 3 to 4 we applied the composition rule for actions; from line 4 to 5 we used the rule  $(ab)^{-1} = b^{-1}a^{-1}$  and in the remaining lines we used the definitions of the group convolution and actions.

<sup>1</sup>Anonymous Institution, Anonymous City, Anonymous Region, Anonymous Country. Correspondence to: Anonymous Author <anon.email@domain.com>.

Preliminary work. Under review by the International Conference on Machine Learning (ICML). Do not distribute.

### 2. The Equivariance Loss

In the equivariance loss we make use of the following statement

$$\mathcal{R}_S[f] \star_{\mathbb{Z}^d} \mathcal{R}_R[\psi] = \mathcal{R}_S[f \star_{\mathbb{Z}^d} \mathcal{R}_{S^{-1}R}[\psi]]. \quad (8)$$

The derivation is as follows. We begin by noting that the roto-translation operator can be written  $\mathcal{L}_{R,z} = \mathcal{T}_z \mathcal{R}_R$ , where  $\mathcal{T}_z$  is the translation operator and  $\mathcal{R}_R$  is the rotation operator. Then we consider the convolution of an  $S$ -rotated image  $\mathcal{R}_S[f]$  and filters  $\psi$

$$[\mathcal{R}_S[f] \star_G \psi](R, z) = \sum_{x \in G} \mathcal{R}_S[f](x) \mathcal{T}_z[\mathcal{R}_R[\psi]](x) \quad (9)$$

$$= [\mathcal{R}_S[f](x) \star_G \mathcal{R}_R[\psi]](x) \quad (10)$$

which constitutes the LHS of the expression. Now for the RHS.

$$\mathcal{R}_S[f] \star_{\mathbb{Z}^d} \mathcal{R}_R[\psi] \quad (11)$$

$$= [\mathcal{L}_{S,0}[f] \star_G \psi](R, z) \quad (12)$$

$$= \sum_{x \in G} \mathcal{L}_{S,0}[f](x) \mathcal{L}_{R,z}[\psi](x) \quad (13)$$

$$= \sum_{x \in G} f(x) \mathcal{L}_{(S,0)^{-1}}[\mathcal{L}_{R,z}[\psi]](x) \quad (14)$$

$$= \sum_{x \in G} f(x) \mathcal{L}_{(S^{-1},0)}[\mathcal{L}_{R,z}[\psi]](x) \quad (15)$$

$$= \sum_{x \in G} f(x) \mathcal{L}_{(S^{-1}R, S^{-1}z)}[\psi](x) \quad (16)$$

$$= \sum_{x \in G} f(x) \mathcal{L}_{(S^{-1}R, S^{-1}z)}[\psi](x) \quad (17)$$

$$= \sum_{x \in G} f(x) \mathcal{T}_{S^{-1}z}[\mathcal{R}_{S^{-1}R}[\psi]](x) \quad (18)$$

$$= \sum_{x \in G} f(x) \mathcal{R}_{S^{-1}R}[\psi](x - S^{-1}z) \quad (19)$$

$$= [f \star_{\mathbb{Z}^d} \mathcal{R}_{S^{-1}R}[\psi]](S^{-1}z) \quad (20)$$

$$= \mathcal{R}_S[f \star_{\mathbb{Z}^d} \mathcal{R}_{S^{-1}R}[\psi]](z) \quad (21)$$

which constitutes the RHS of the expression.

### 3. Architecture

Here we detail the architecture used in our experiments.

Table 1. The architectures of the translational and roto-translational equivariant models. After every convolution we place a batch normalization layer and a ReLU nonlinearity. Across the two models we have fixed the number of channels, such that the number of parameters is roughly the same. ‘conv $N$ ’ stands for a standard translational convolution of size  $N \times N$  and ‘Gconv $N$ ’ stands for a roto-translational group convolution. Horizontal lines correspond to max pooling of kernel size 2 and stride 2. The global max pool corresponds to a max pool over the spatial dimensions and the orientation dimensions of the activation tensor.

| TRANSLATIONAL   | ROTO-TRANSLATIONAL |
|-----------------|--------------------|
| conv3-96        | Gconv-33           |
| conv3-96        | Gconv-33           |
| conv3-96        | Gconv-33           |
| conv3-192       | Gconv-67           |
| conv1-192       | Gconv-67           |
| conv1-192       | Gconv-67           |
| global max pool | global max pool    |
| softmax-layer   | softmax-layer      |

3.1. Visualization of bases and reconstructions

References

Cohen, T. and Welling, M. Group equivariant convolutional networks. In *Proceedings of the 33rd International Conference on Machine Learning, ICML 2016, New York City, NY, USA, June 19-24, 2016*, pp. 2990–2999, 2016.

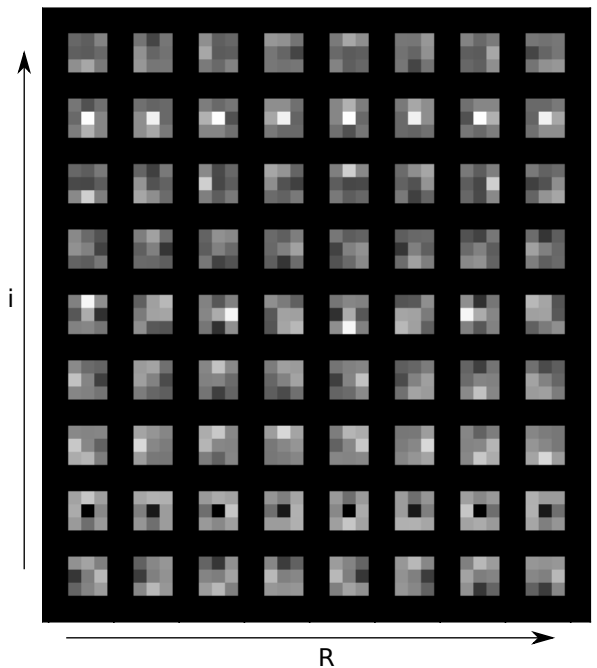

Figure 1. A basis with 9 elements at 8 orientations from an PARTIAL model.  $\{e_R^i\}_{i,R}$

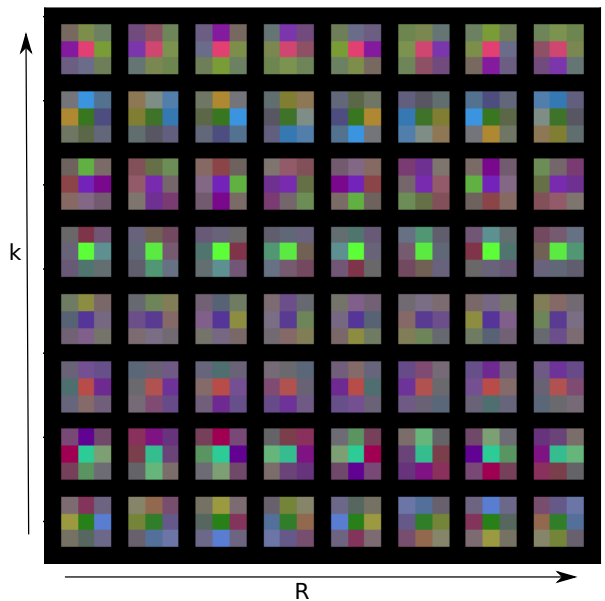

Figure 2. A set of filters from the first layer of an PARTIAL model.  $\mathcal{R}_R[\psi_k]$

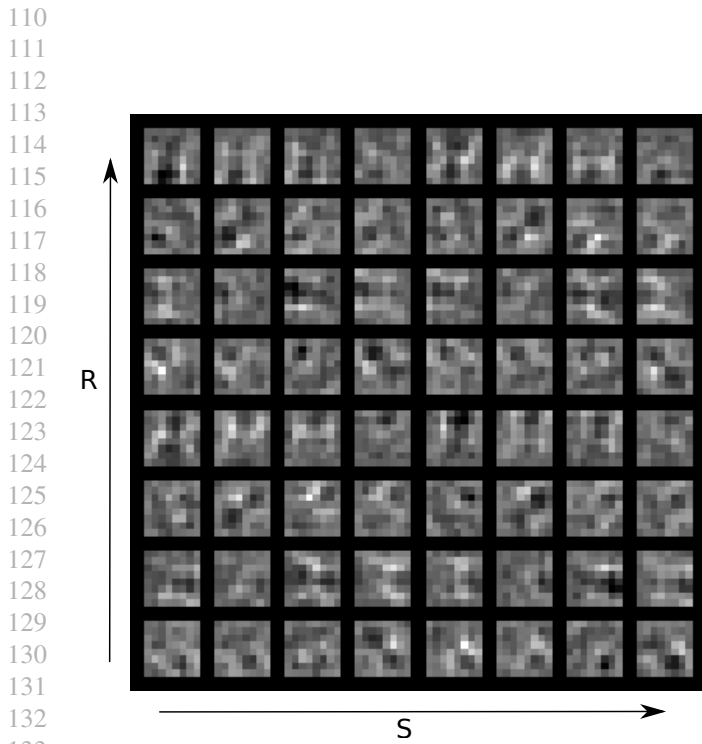

135 *Figure 3. A set activations from an PARTIAL model’s layer 6.*  
136  $\mathcal{R}_R[f] \star_{\mathbb{Z}^d} \mathcal{R}_S[\psi]$

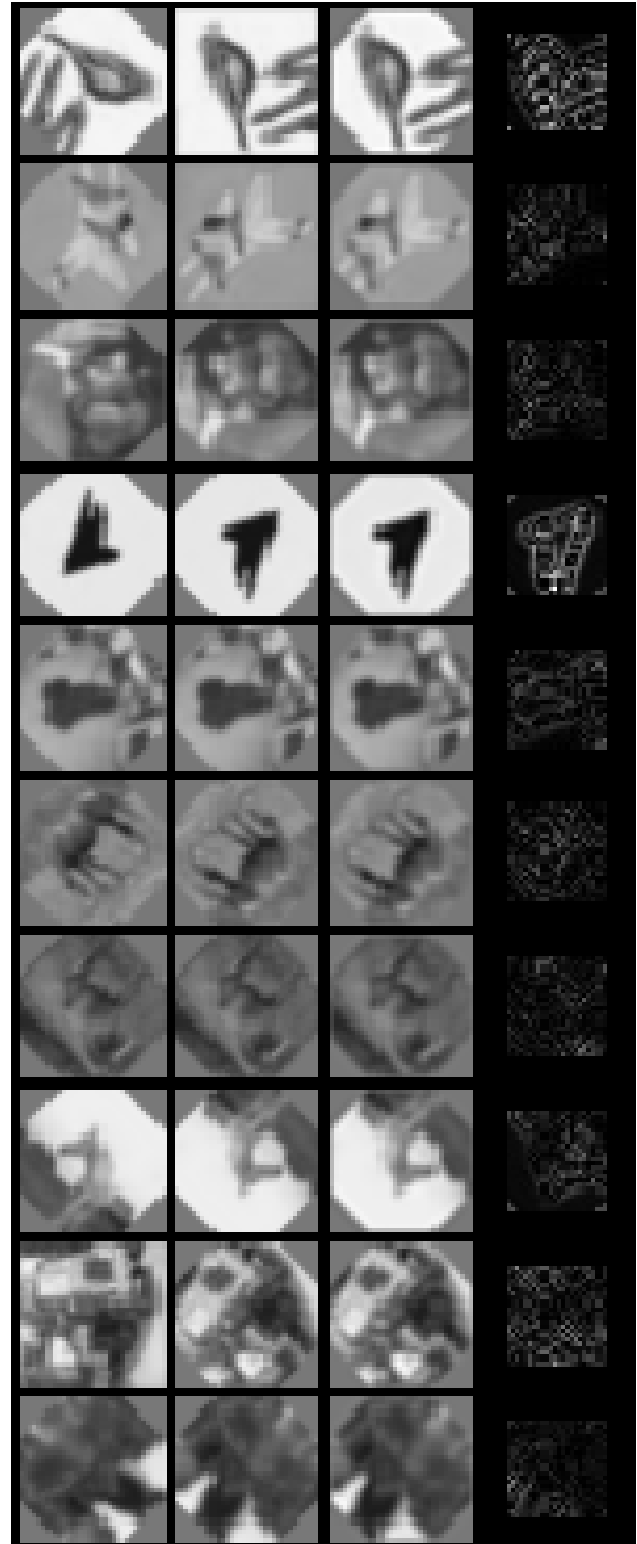

157  
158  
159  
160  
161  
162  
163  
164

*Figure 4. A set of 2 pairs from the reconstruction task, when training the basis. The loss is normalized to the scale of the loss, otherwise it would be too small to distinguish anything.*

*Figure 5. A set of 10 pairs from the reconstruction task, when training the basis. The columns represent in order: the input, the target, the reconstruction, the loss.*
